# Supplementary material
Source: PubMed Central journal article supplement (PMC4128961)
Supplement: NIHMS527142-supplement-1_si_002.pdf [file NIHMS527142-supplement-1_si_002.pdf]

**pH 7.4**

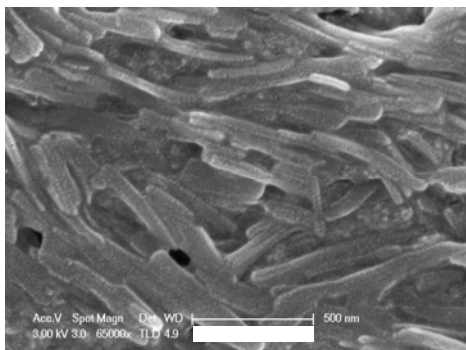

**pH 6.0**

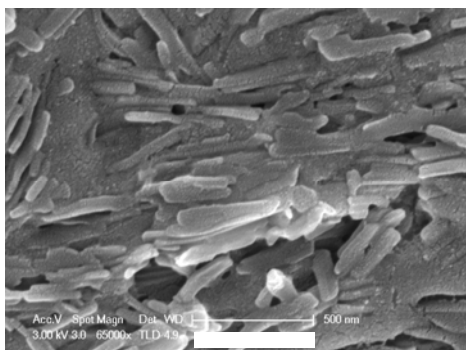

**pH 4.5**

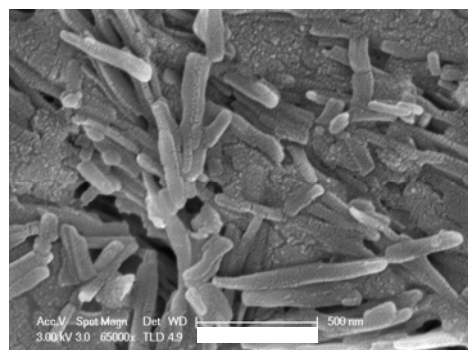

**SI Figure 1**

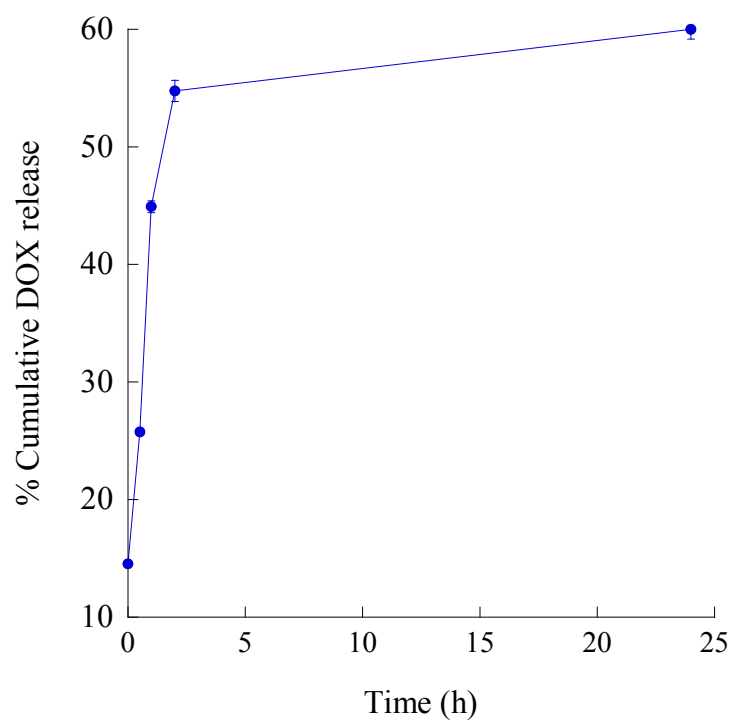

**SI Figure 2**

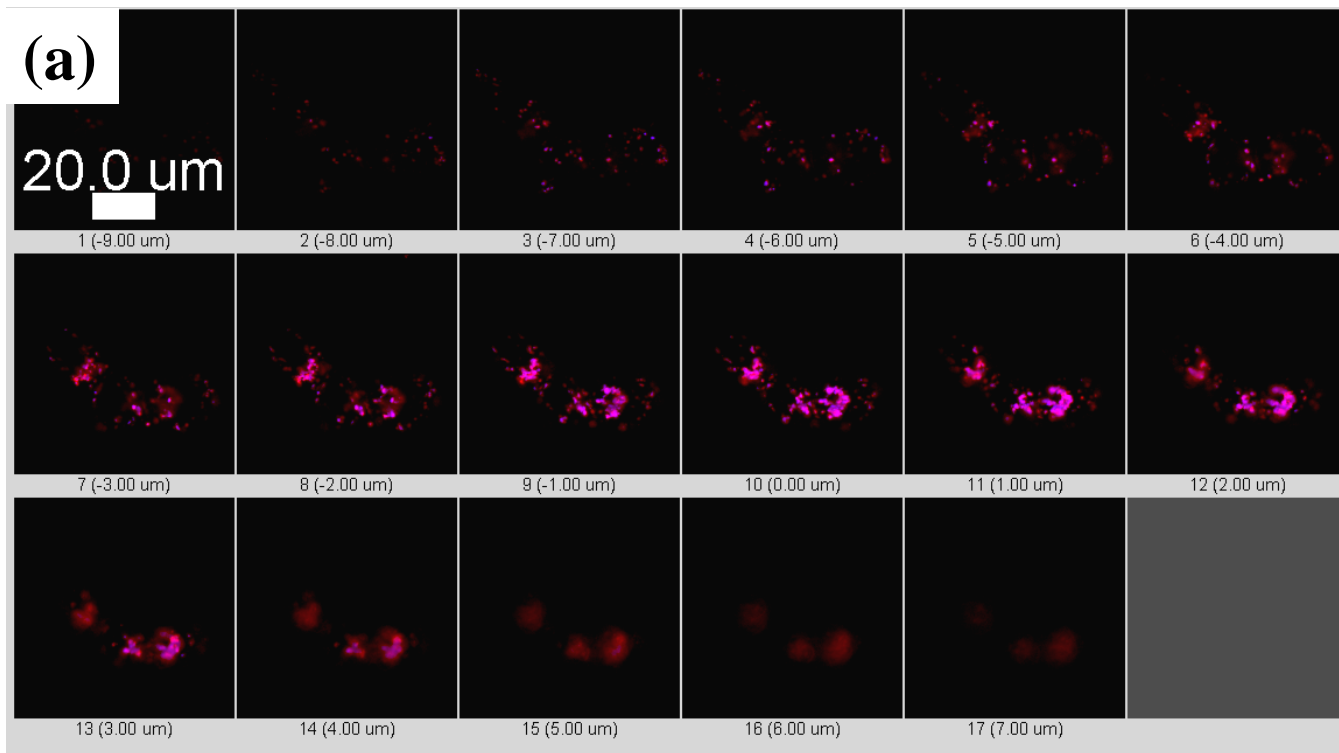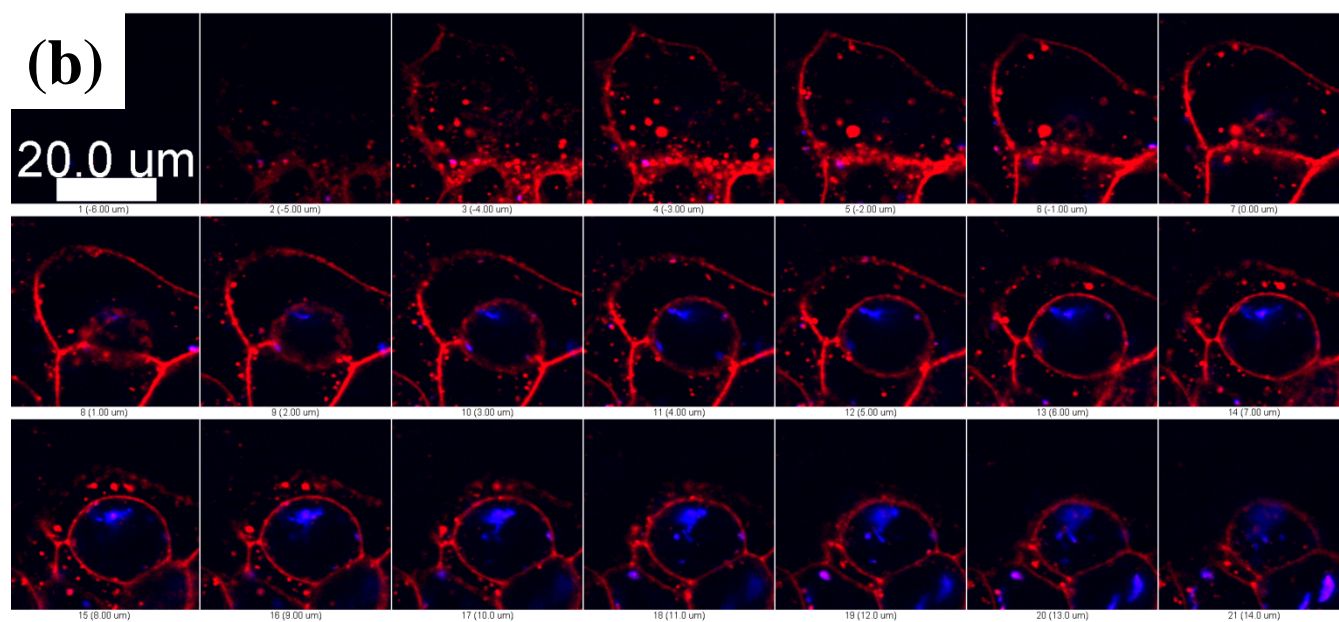

**SI Figure 3**

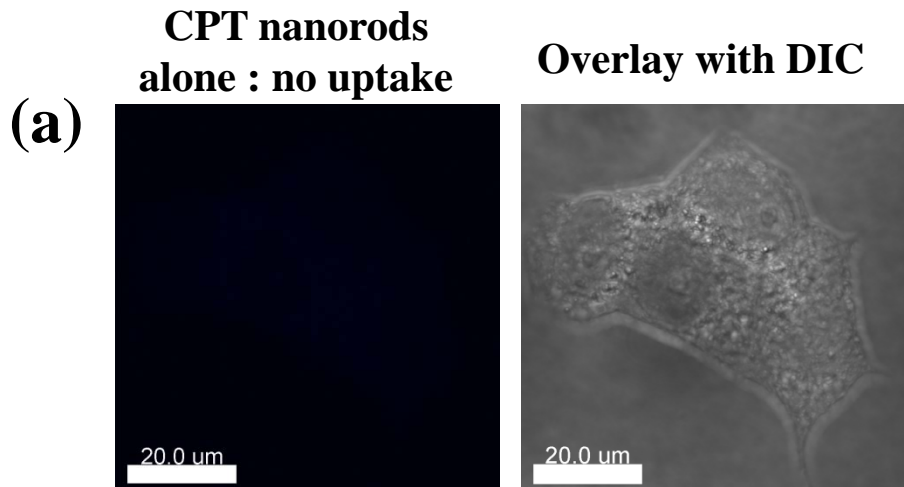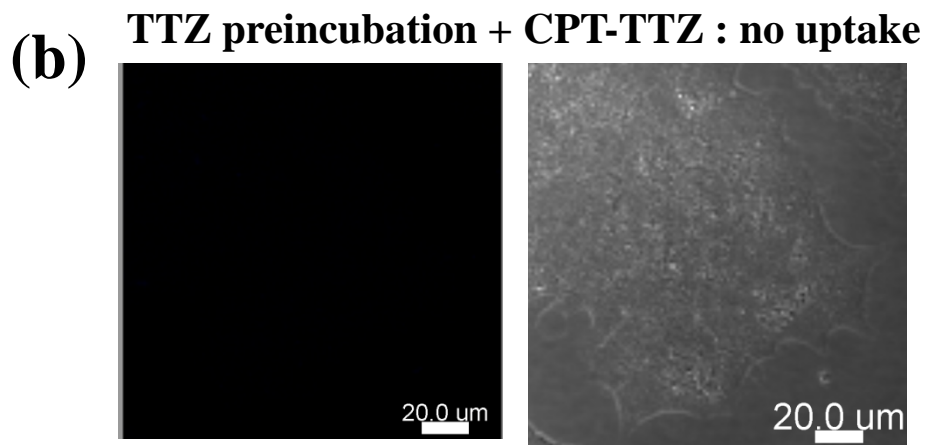

**(c) Simultaneous treatments: CPT in DMSO + TTZ solution + free DOX**

**Blue CPT : no uptake**

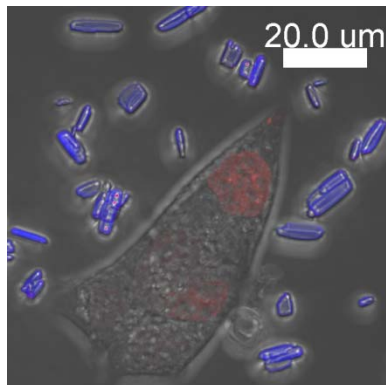

**Red DOX : nucleus**

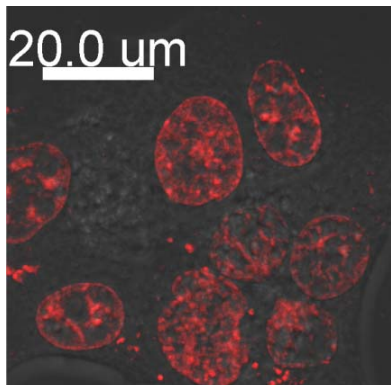

**Red Alexa 594 TTZ : cytoplasm; not in the plasma membrane**  
**Green Nucleus**

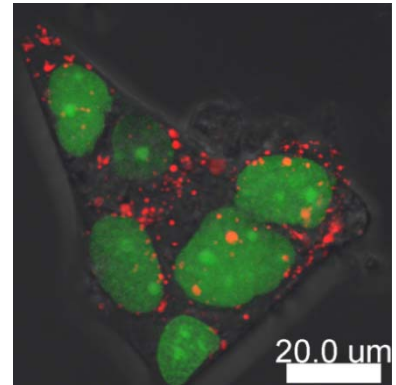

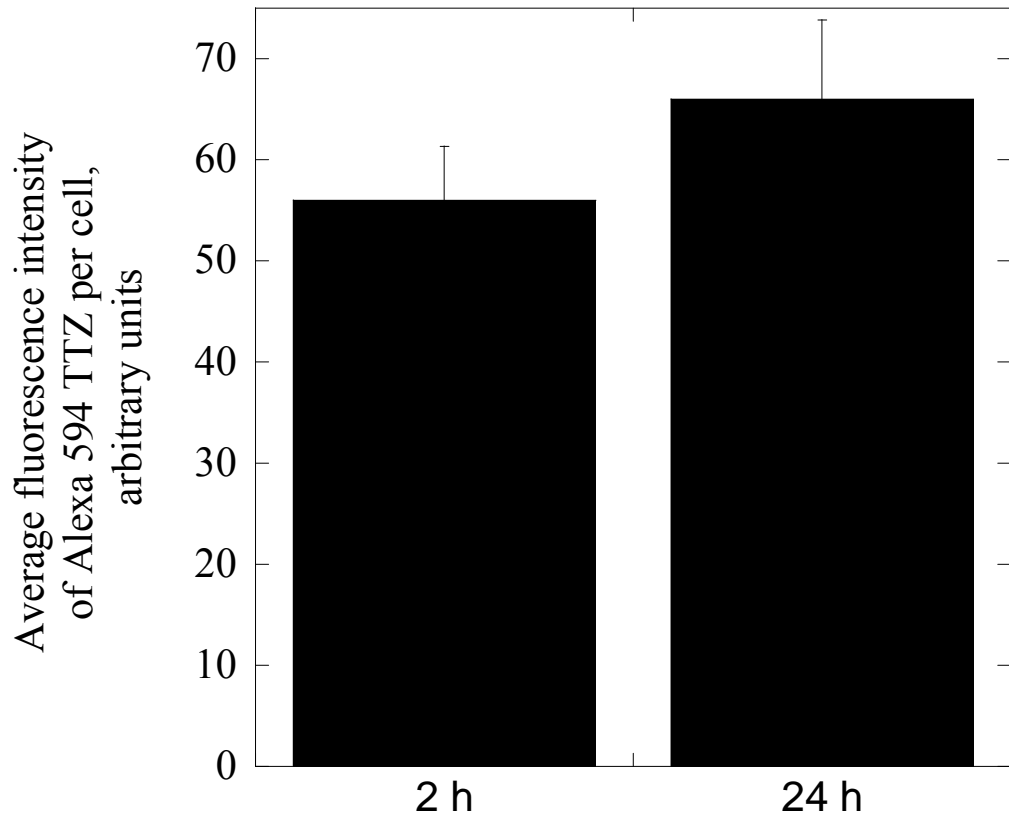

**SI Figure 5**

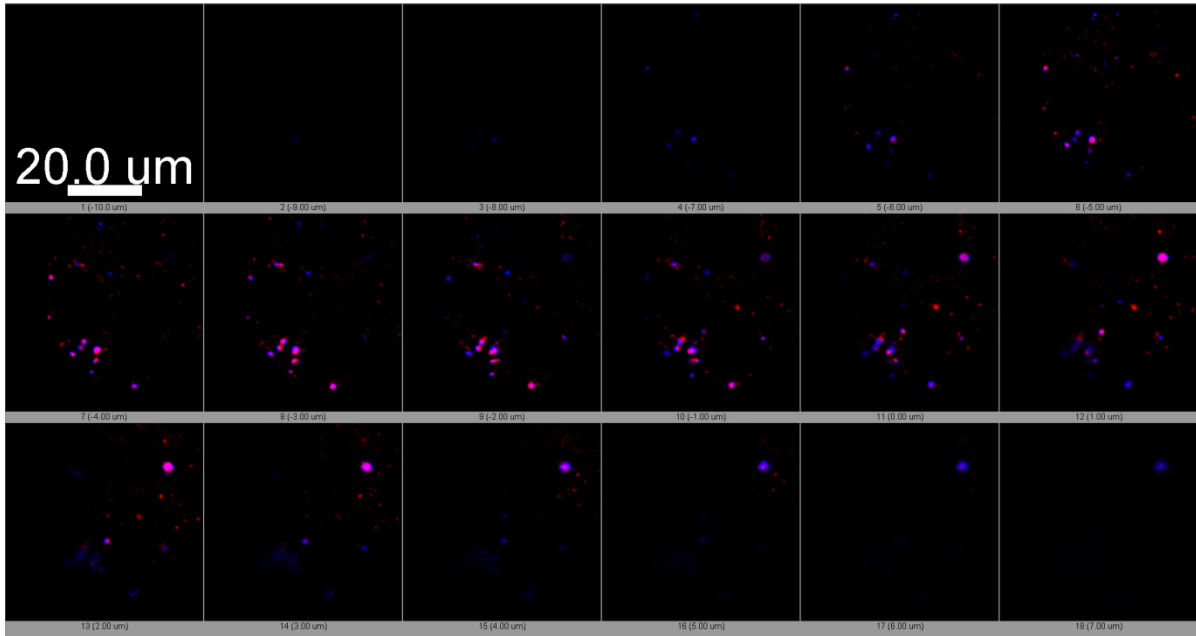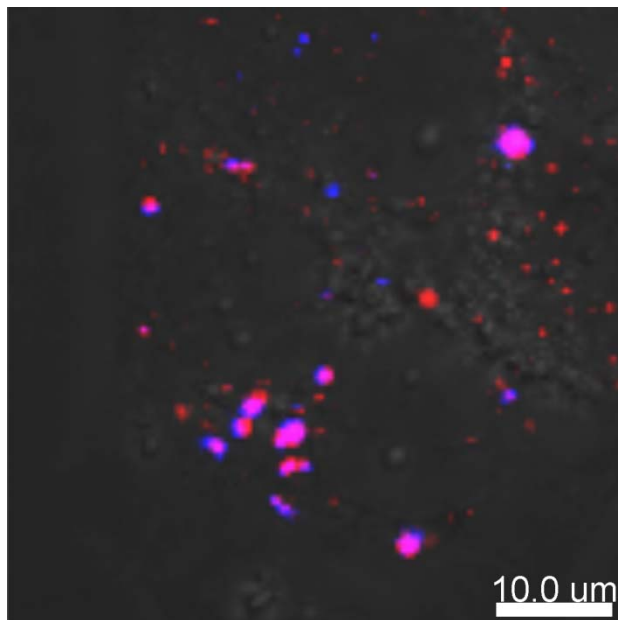

**SI Figure 6**

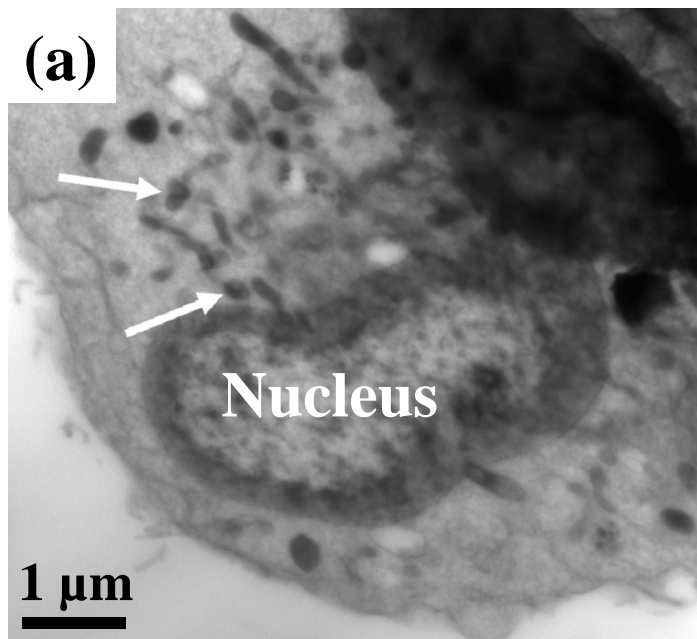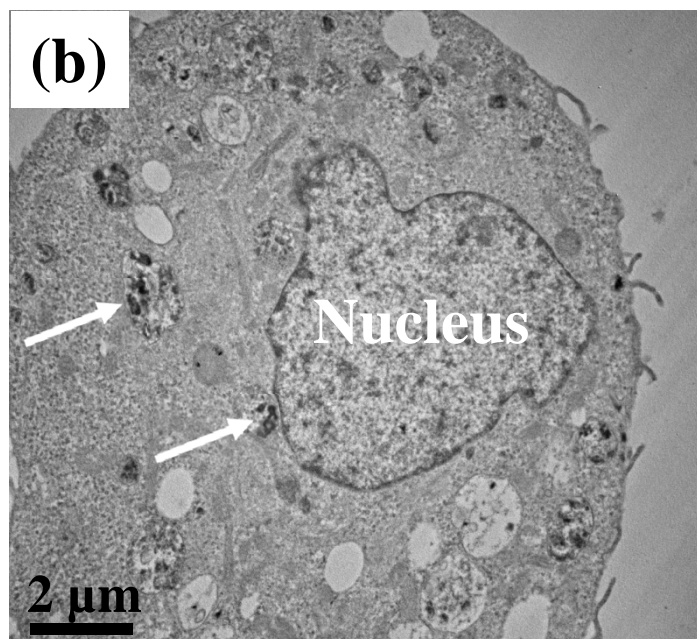

**BT-474 cell : PBS treated**

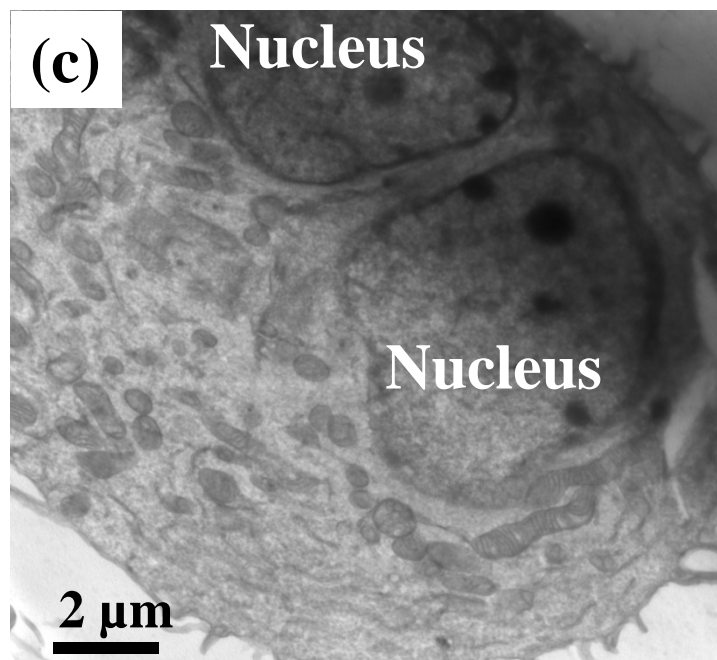

**SI Figure 7**

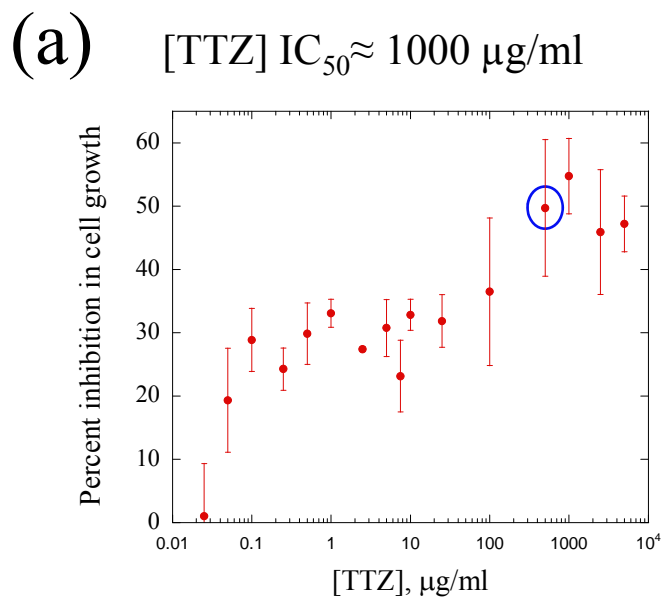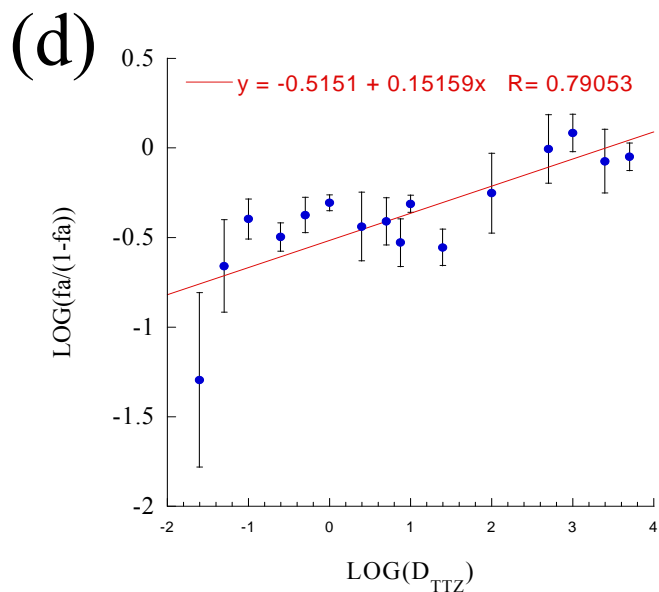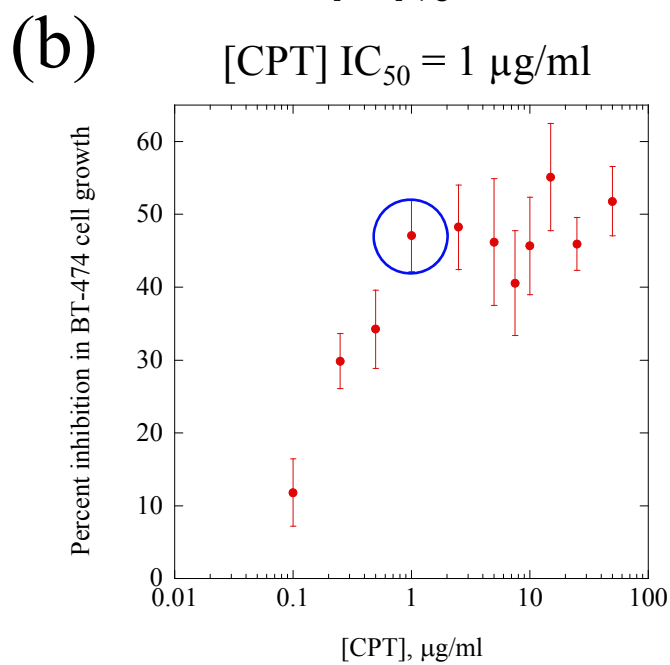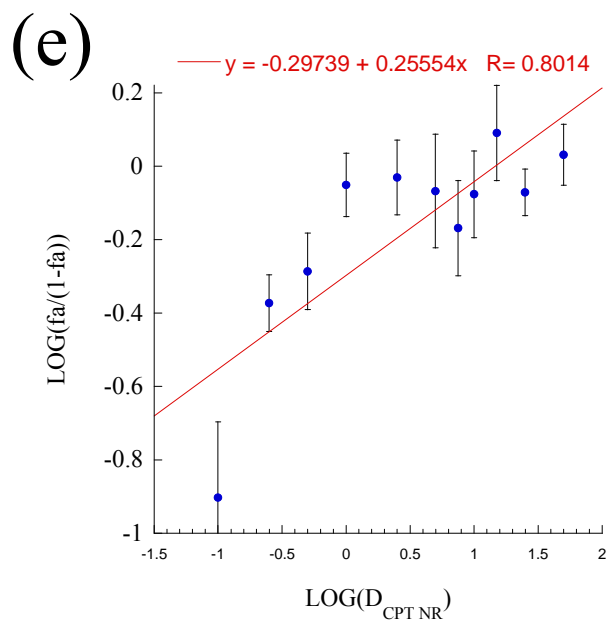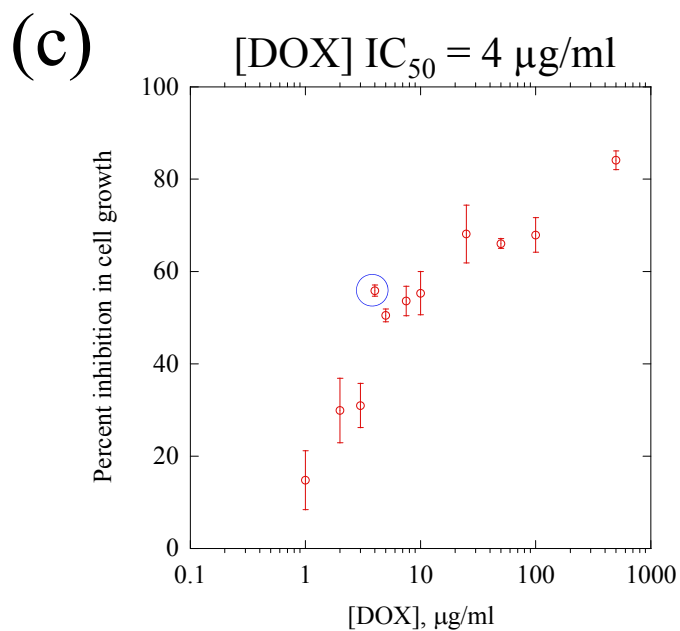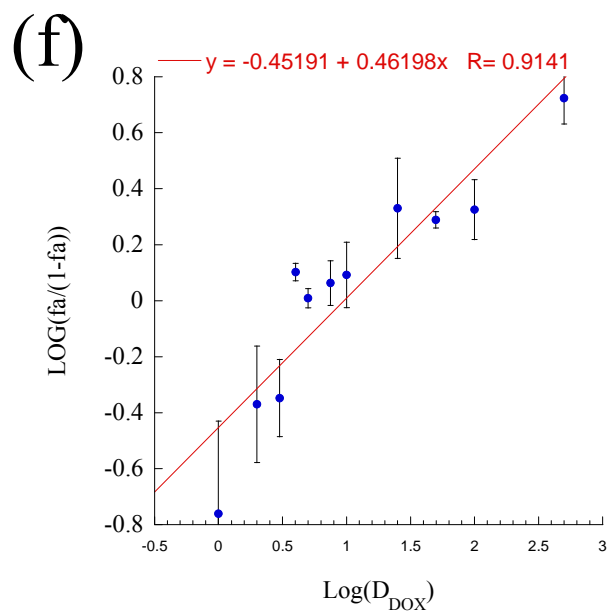



(a)

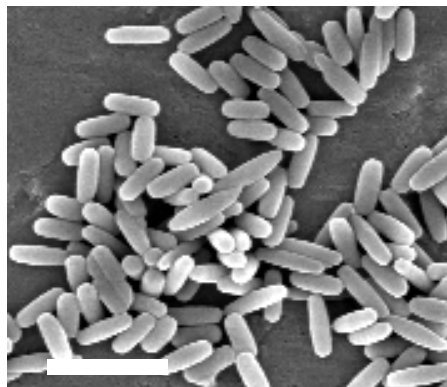

(b)

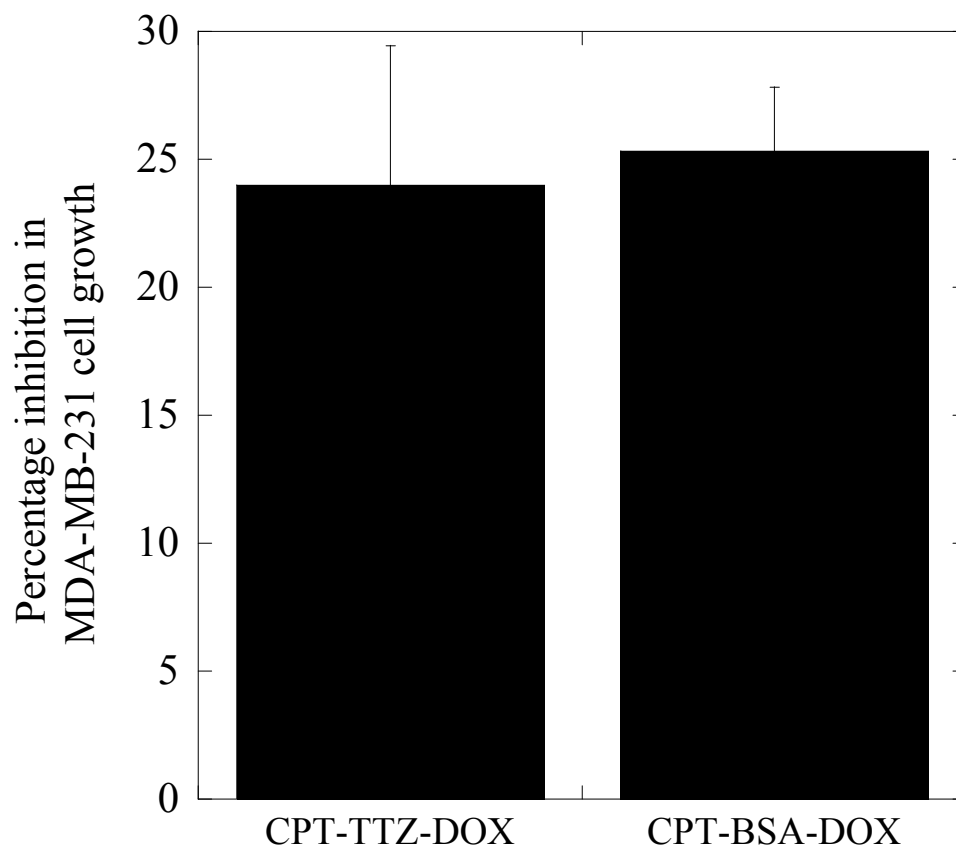

SI Figure 9

Background: cells without dye

BT-474 cells: PBS treated

TTZ treated

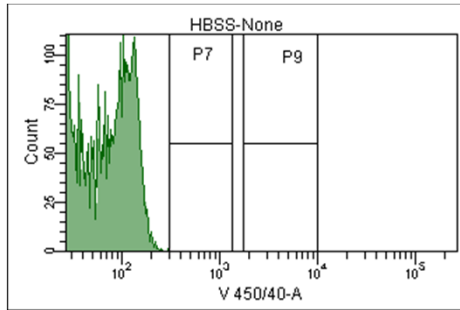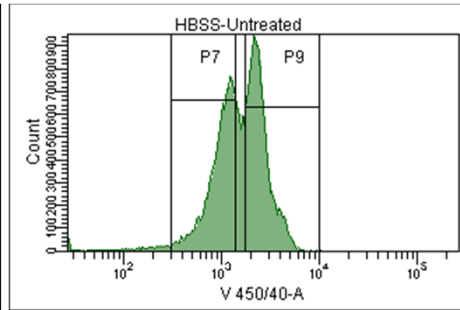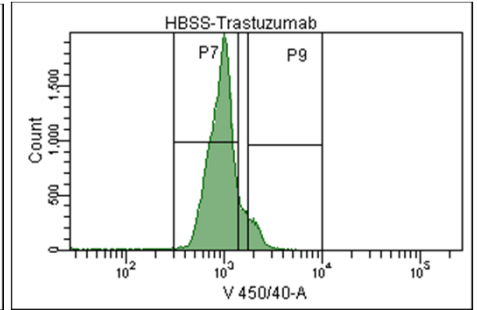

Polystyrene nanorod -BSA

Polystyrene nanorod -TTZ

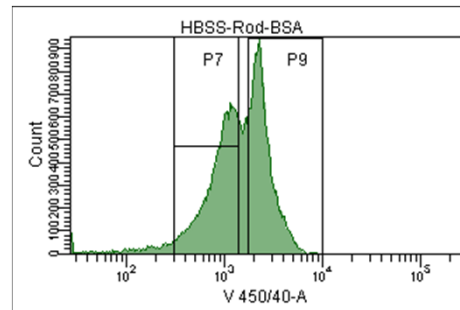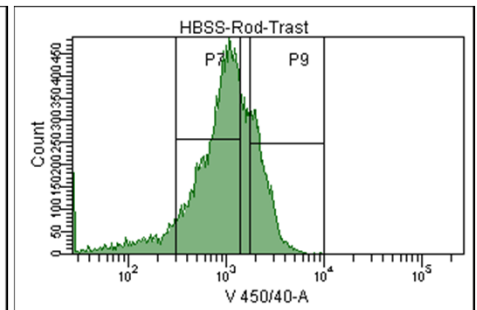

CPT-TTZ

CPT-TTZ-DOX

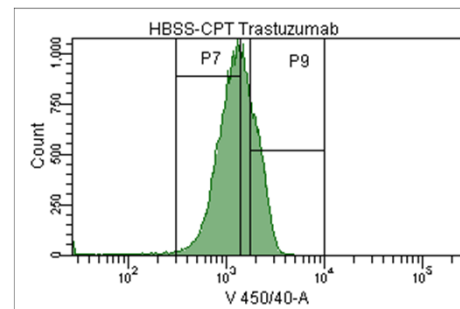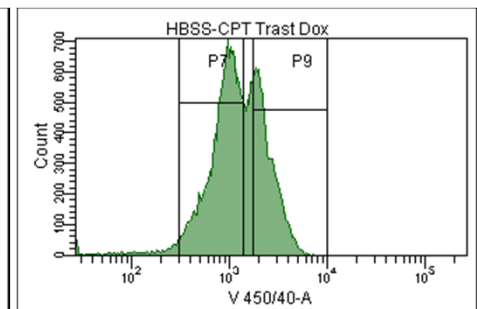

SI Figure 10

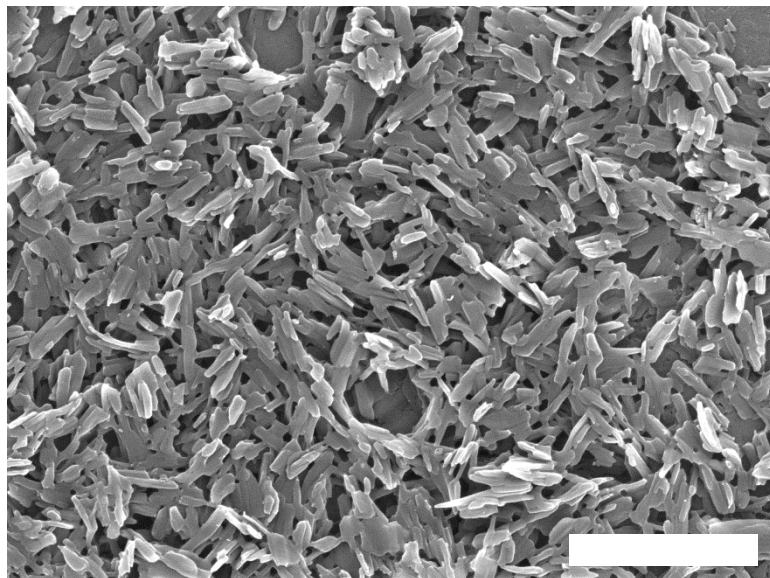

**SI Figure 11**

| <b>Initial CPT, <math>\mu\text{g}</math></b>      | <b>CPT after TTZ adsorption, <math>\mu\text{g}</math></b> | <b>Initial BSA or TTZ, <math>\mu\text{g}</math></b> | <b>BSA adsorbed on CPT, <math>\mu\text{g}</math></b> | <b>TTZ adsorbed on CPT, <math>\mu\text{g}</math></b> | <b>Initial DOX loaded to 500<math>\mu\text{g}</math> CPT of CPT-TTZ, <math>\mu\text{g}</math></b> | <b>CPT after DOX adsorption to CPT-TTZ, <math>\mu\text{g}</math></b> | <b>DOX adsorbed on CPT-TTZ, <math>\mu\text{g}</math> (loading efficiency, %)</b> |
|---------------------------------------------------|-----------------------------------------------------------|-----------------------------------------------------|------------------------------------------------------|------------------------------------------------------|---------------------------------------------------------------------------------------------------|----------------------------------------------------------------------|----------------------------------------------------------------------------------|
| 1000                                              | 601.6 $\pm$ 10.7                                          | 100                                                 | 72.6 $\pm$ 8.4                                       | 97.7 $\pm$ 2.5                                       | 1000                                                                                              | 353 $\pm$ 58.2                                                       | 924.2 $\pm$ 8.2<br>(92.4 $\pm$ 0.8%)                                             |
| <b>Zeta potential of nanoparticles in PBS, mV</b> |                                                           |                                                     |                                                      |                                                      |                                                                                                   |                                                                      |                                                                                  |
| <b>CPT</b>                                        |                                                           | <b>CPT-TTZ</b>                                      |                                                      | <b>CPT-TTZ-DOX</b>                                   |                                                                                                   |                                                                      |                                                                                  |
| - 25.1 $\pm$ 3.8                                  |                                                           | -7.5 $\pm$ 1.3                                      |                                                      | -4.8 $\pm$ 0.22                                      |                                                                                                   |                                                                      |                                                                                  |

**SI Table I**

| <b>CPT-TTZ-<br/>DOX</b>  | <b>TTZ</b> | <b>DOX</b> | <b>CPT-<br/>BSA-<br/>DOX</b> | <b>CPT-<br/>BSA+PS<br/>Rod TTZ<br/>+DOX</b> | <b>CPT-<br/>DMSO+<br/>TTZ+DOX</b> | <b>CPT-<br/>TTZ</b> | <b>Topotecan+<br/>TTZ+DOX</b> |
|--------------------------|------------|------------|------------------------------|---------------------------------------------|-----------------------------------|---------------------|-------------------------------|
| p-value<br>compared with | 0.016      | 0.023      | 0.045                        | 0.052                                       | 0.052                             | 0.022               | 0.052                         |

**SI Table II**

---

| <b>parameter</b>       | <b>TTZ</b> | <b>CPT</b> | <b>DOX</b> |
|------------------------|------------|------------|------------|
| m                      | 0.15       | 0.26       | 0.46       |
| D <sub>m</sub> (μg/ml) | 2500       | 14.6       | 9.5        |

---

**SI Table III**
